# Supplementary material
Source: PubMed Central journal article supplement (PMC8865198)
Supplement: NIHMS1770521-supplement-Supplemental__Table_3.pdf [file NIHMS1770521-supplement-Supplemental__Table_3.pdf]

| Table S3. Multivariate linear regression results for Nef (undetectable vs. detectable) predicting outcomes |             |             |             |              |                             |                                |                  |                  |                  |                         |
|------------------------------------------------------------------------------------------------------------|-------------|-------------|-------------|--------------|-----------------------------|--------------------------------|------------------|------------------|------------------|-------------------------|
| Outcome Variable <sup>A</sup>                                                                              | Estimate    | 95% LCL     | 95% UCL     | p-Value      | MANOVA p-Value <sup>B</sup> | Adjusted Estimate <sup>C</sup> | Adjusted 95% LCL | Adjusted 95% UCL | Adjusted p-Value | Adjusted MANOVA p-Value |
| <i>Participants with HAND (n=22)</i>                                                                       |             |             |             |              |                             |                                |                  |                  |                  |                         |
| ABCA1 <sup>D</sup>                                                                                         | -0.22       | -0.49       | 0.05        | 0.105        | -                           | -0.15                          | -0.46            | 0.17             | 0.331            | -                       |
| Flotillin-1                                                                                                | 0.26        | -0.02       | 0.54        | 0.070        | -                           | 0.19                           | -0.16            | 0.53             | 0.271            | -                       |
| p-Tau217 <sup>E</sup>                                                                                      | 0.48        | -0.08       | 1.04        | 0.089        | -                           | 0.33                           | -0.24            | 1.14             | 0.183            | -                       |
| Overall model                                                                                              | -           | -           | -           | -            | 0.051                       | -                              | -                | -                | -                | 0.304                   |
| <i>All participants with HIV (n=33)</i>                                                                    |             |             |             |              |                             |                                |                  |                  |                  |                         |
| ABCA1 <sup>D</sup>                                                                                         | -0.14       | -0.39       | 0.10        | 0.244        | -                           | -0.10                          | -0.37            | 0.16             | 0.423            | -                       |
| Flotillin-1                                                                                                | 0.10        | -0.21       | 0.40        | 0.511        | -                           | 0.08                           | -0.25            | 0.41             | 0.634            | -                       |
| p-Tau217 <sup>E</sup>                                                                                      | <b>0.62</b> | <b>0.20</b> | <b>1.04</b> | <b>0.005</b> | -                           | <b>0.65</b>                    | <b>0.20</b>      | <b>1.09</b>      | <b>0.006</b>     | -                       |
| Overall model                                                                                              | -           | -           | -           | -            | <b>0.014</b>                | -                              | -                | -                | -                | <b>0.030</b>            |
| <sup>A</sup> Modeling effect of the predictor Nef = detectable (undetectable as the reference category)    |             |             |             |              |                             |                                |                  |                  |                  |                         |
| <sup>B</sup> MANOVA p-value by Pillai's trace exact F test for the overall effect of Nef                   |             |             |             |              |                             |                                |                  |                  |                  |                         |
| <sup>C</sup> Controlling for age, HIV duration (in years), and log <sub>10</sub> viral load                |             |             |             |              |                             |                                |                  |                  |                  |                         |
| <sup>D</sup> Modeling square root of ABCA1 values                                                          |             |             |             |              |                             |                                |                  |                  |                  |                         |
| <sup>E</sup> Modeling log <sub>10</sub> p-Tau217 values                                                    |             |             |             |              |                             |                                |                  |                  |                  |                         |
| Note: significant effects at the alpha=0.05 level are bolded                                               |             |             |             |              |                             |                                |                  |                  |                  |                         |
| LCL - lower confidence limit; UCL - upper confidence limit; MANOVA - multivariate analysis of variance     |             |             |             |              |                             |                                |                  |                  |                  |                         |
