# Supplementary material
Source: PubMed Central journal article supplement (PMC8865198)
Supplement: NIHMS1770521-supplement-Supplemental_Fig_1.pdf [file NIHMS1770521-supplement-Supplemental_Fig_1.pdf]

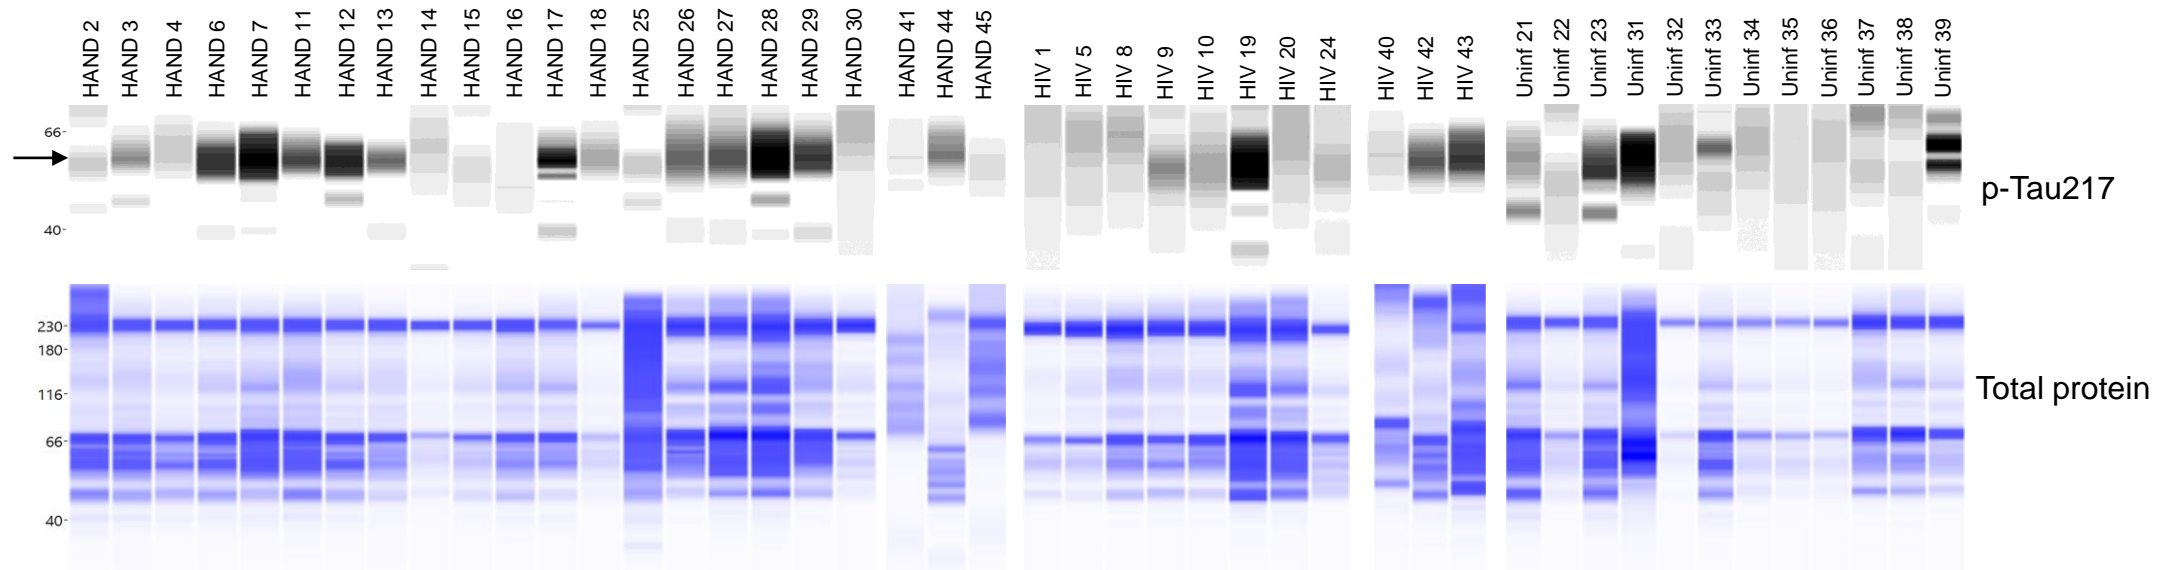

**Figure S1. Western blots for p-Tau217 and total proteins.** Molecular weight markers are shown on the left. Arrow shows position of the p-Tau217 band. Note that position of the p-Tau217 slightly varies between the capillaries.
