# Supplementary material
Source: PubMed Central journal article supplement (PMC8865198)
Supplement: NIHMS1770521-supplement-Supplemental_Fig_2.pdf [file NIHMS1770521-supplement-Supplemental_Fig_2.pdf]

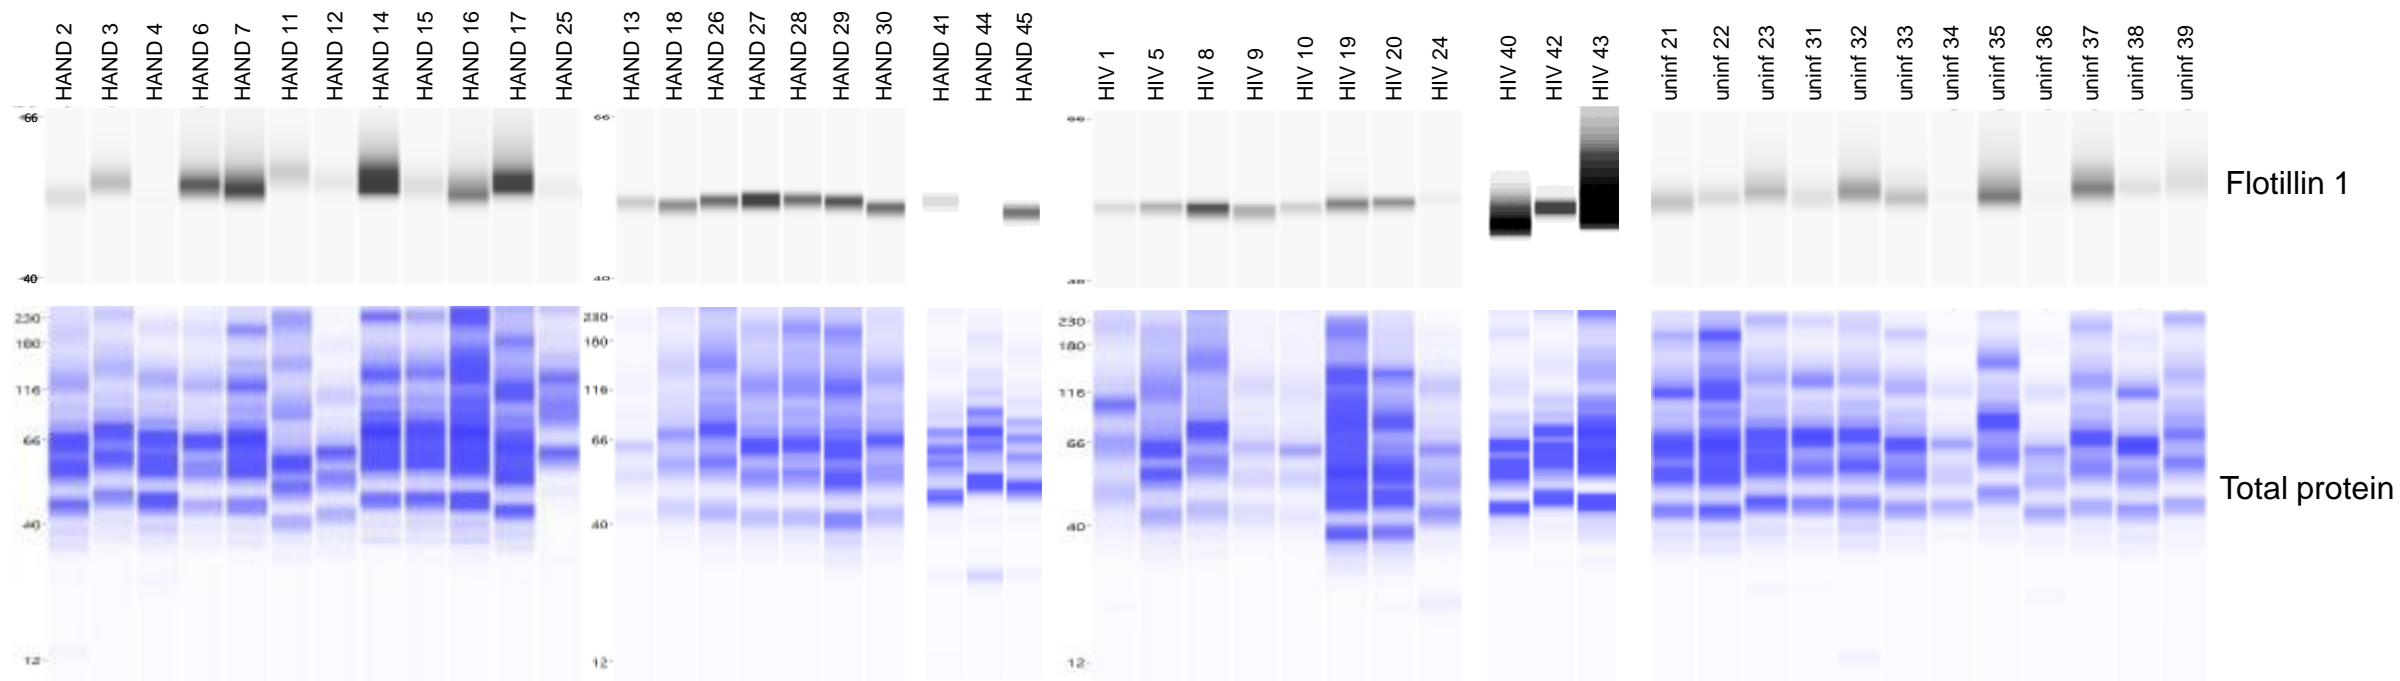

**Figure S2. Western blots for Flotillin 1 and total proteins.** Molecular weight markers are shown on the left. Position of the flotillin 1 band slightly varies between the capillaries.
