# Supplementary material
Source: PubMed Central journal article supplement (PMC8865198)
Supplement: NIHMS1770521-supplement-Supplemental_Fig_3.pdf [file NIHMS1770521-supplement-Supplemental_Fig_3.pdf]

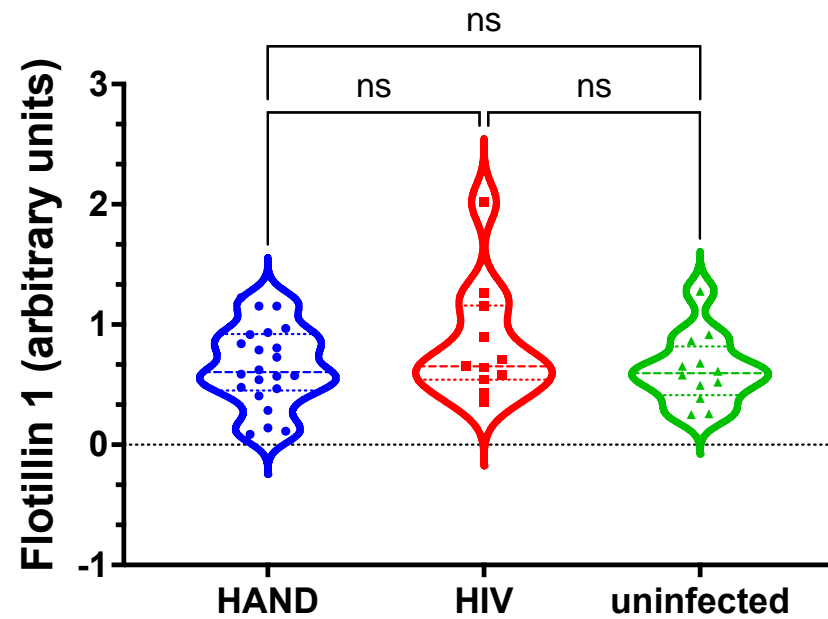

**Figure S3. Comparison of Flotillin 1 abundance between brain samples from HIV-infected individuals with (HAND) and without (HIV) HAND diagnosis and uninfected individuals.** Data points for Flotillin 1 adjusted to total protein levels were obtained using ProteinSimple Compass software and are presented as arbitrary units. Results are presented as violin plots, p values were calculated using Kruskal-Wallis test.
