# Supplementary material
Source: PubMed Central journal article supplement (PMC8865198)
Supplement: NIHMS1770521-supplement-Supplemental_Fig_4.pdf [file NIHMS1770521-supplement-Supplemental_Fig_4.pdf]

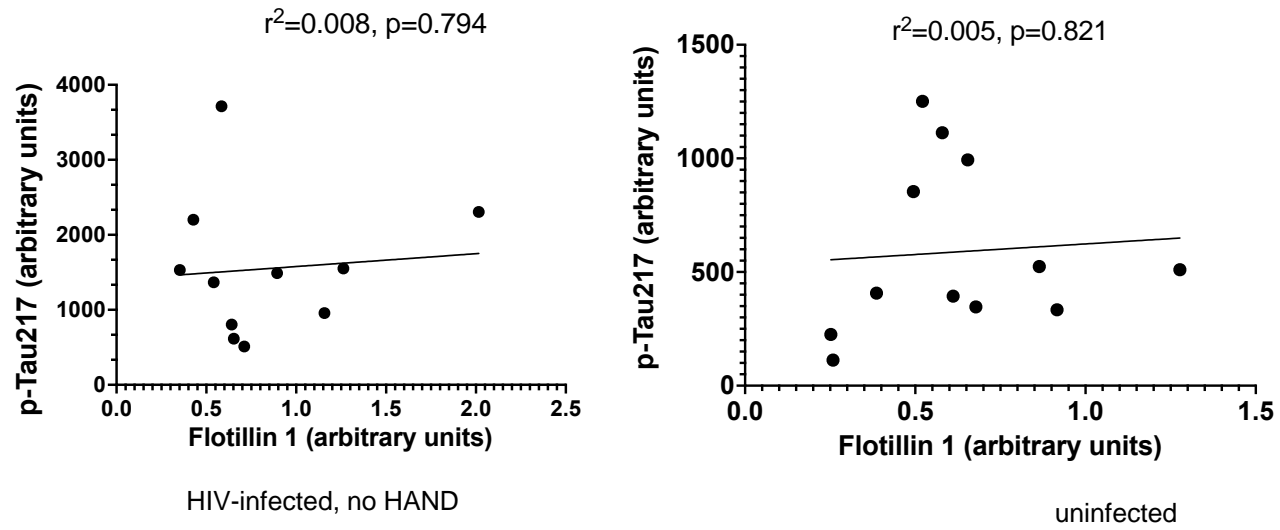

**Figure S4. Simple linear regression analysis of p-Tau217 and flotillin 1.** Analysis was performed using the GraphPad Prism v.9 software.
