# Supplementary material
Source: PubMed Central journal article supplement (PMC8865198)
Supplement: NIHMS1770521-supplement-Supplemental_Fig_5.pdf [file NIHMS1770521-supplement-Supplemental_Fig_5.pdf]

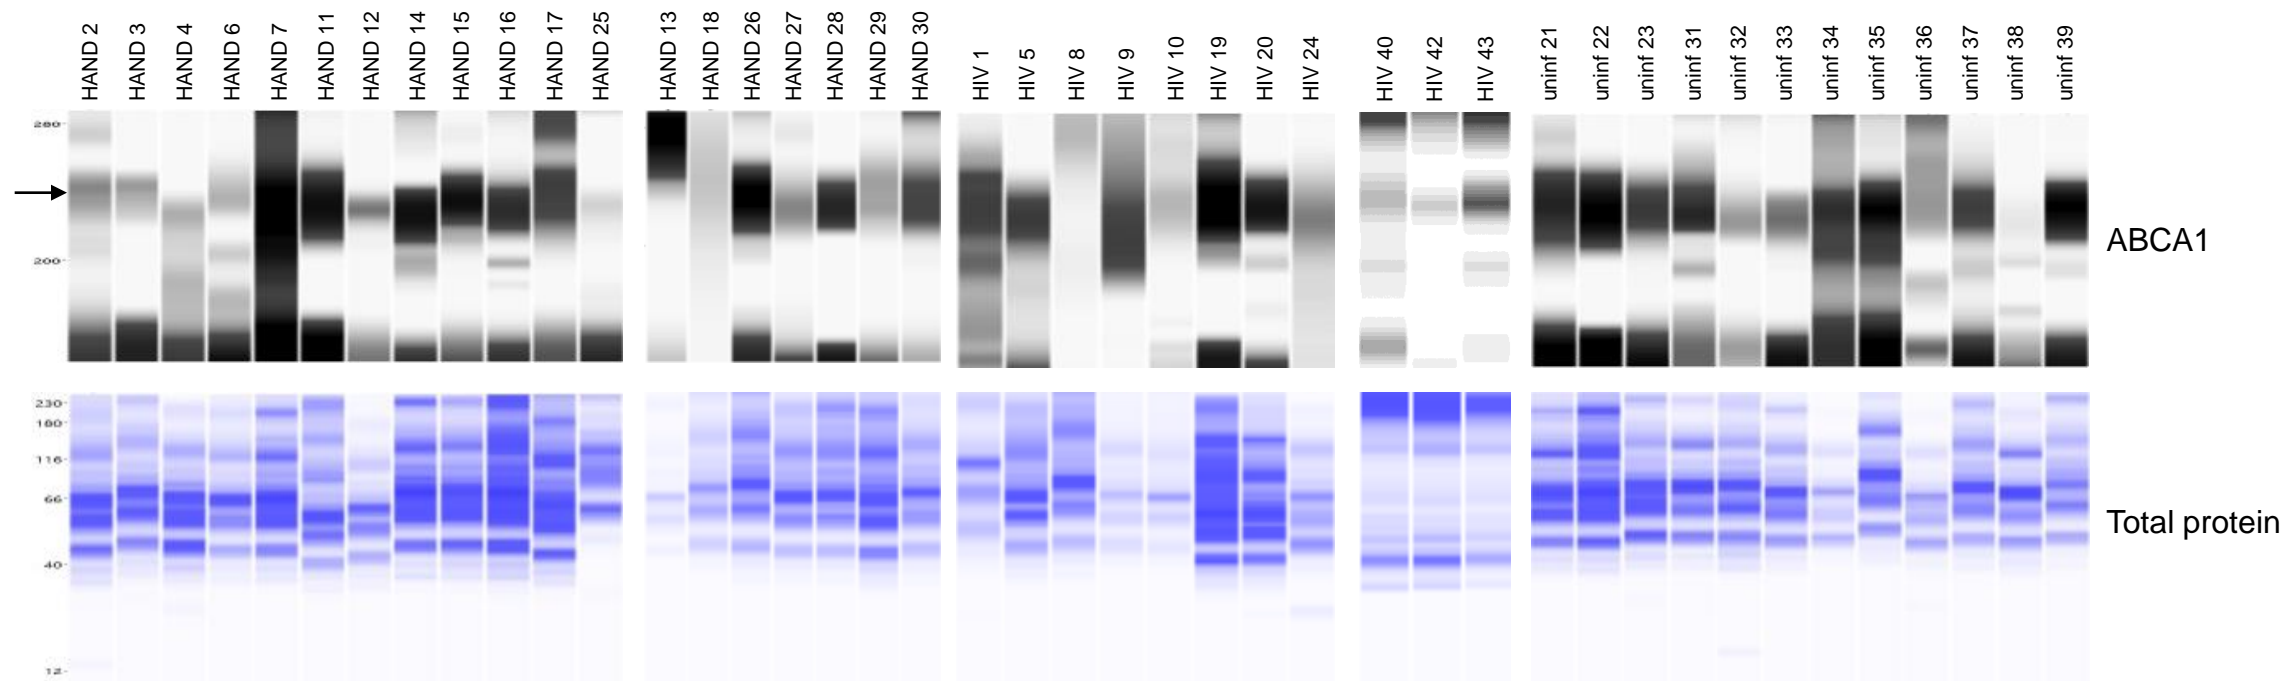

**Figure S5. Western blots for ABCA1 and total proteins.** Molecular weight markers are shown on the left. The arrow shows position of the ABCA1 band, which runs as a smear due to glycosylation. Migration of the band slightly differs between the capillaries.
