# Supplementary material
Source: PubMed Central journal article supplement (PMC8865198)
Supplement: NIHMS1770521-supplement-Supplemental_Fig_6.pdf [file NIHMS1770521-supplement-Supplemental_Fig_6.pdf]

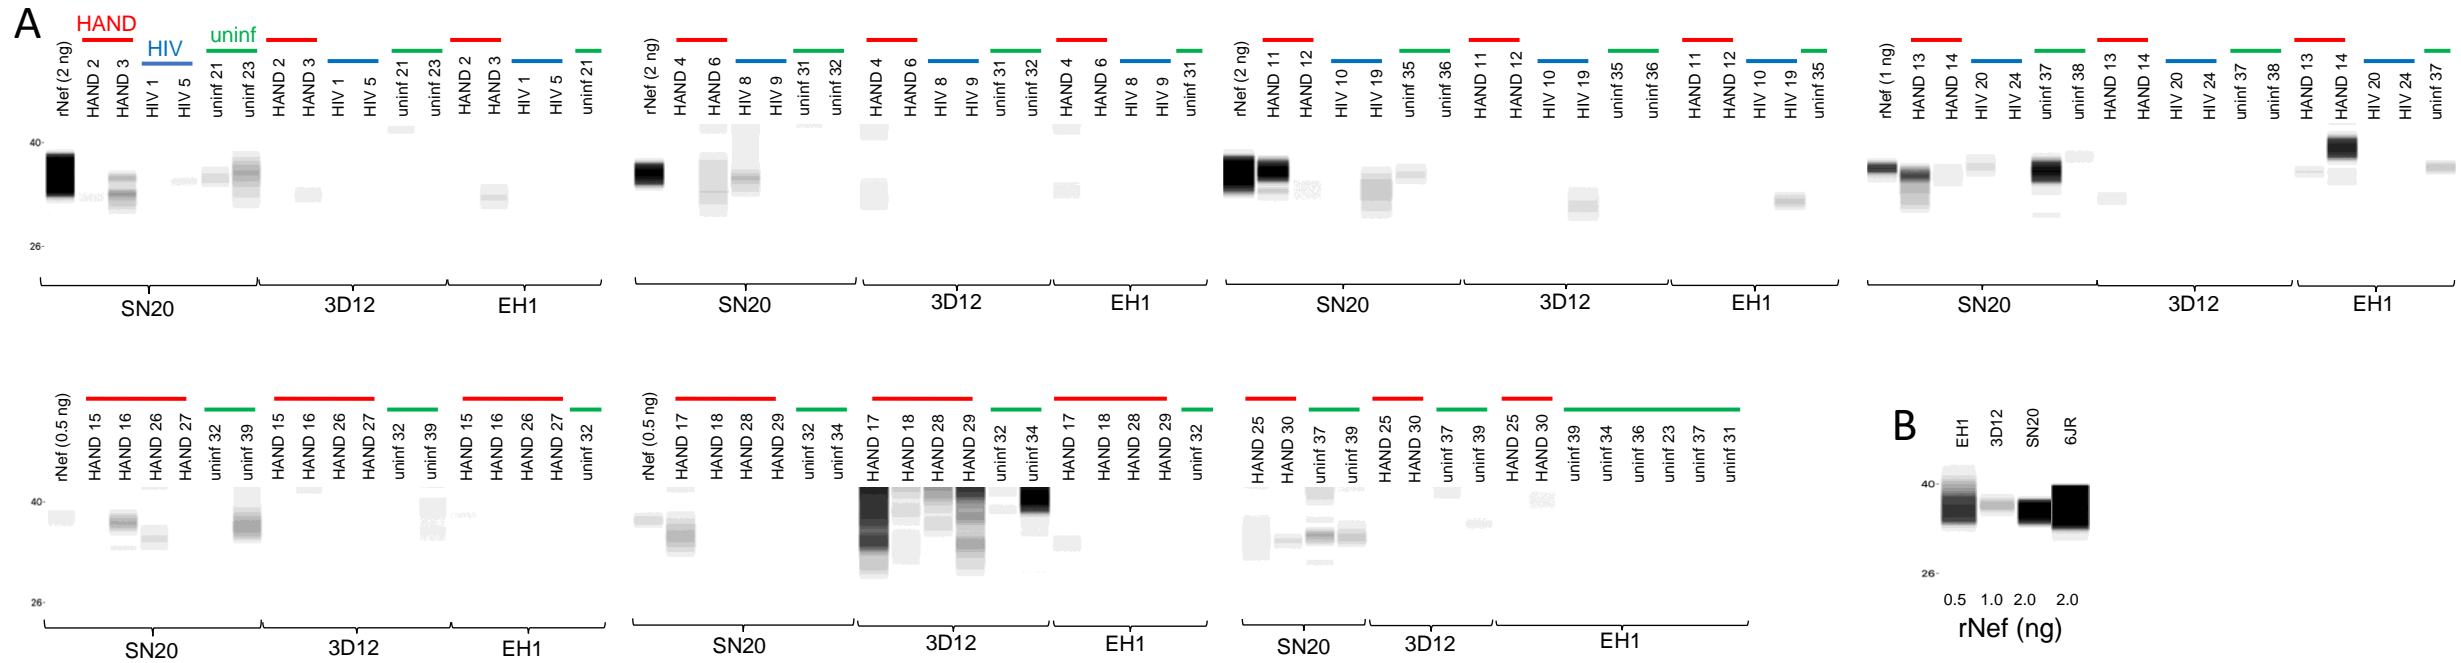

**Figure S6. Analysis of Nef in brain samples.** Brain lysates were analyzed on ProteinSimple Jess instrument using the Compass software. A – Sample IDs are shown on top of the gels, and antibodies used for detection – below the gels. B – Detection of recombinant Nef from HIV-1<sub>SF2</sub> by antibodies used in this study. Color coded lines show the sample group.
