# Supplementary material
Source: PubMed Central journal article supplement (PMC8865198)
Supplement: NIHMS1770521-supplement-Supplemental_Table_2.pdf [file NIHMS1770521-supplement-Supplemental_Table_2.pdf]

**Table S2. Accession numbers, Proteome Discoverer 2.5 Scores and top peptide sequences for Nef detected by LC-MS/MS in the HAND samples.**

| <b>Sample</b> | <b>Accession</b> | <b>PD Score</b> | <b>peptide</b>                                |
|---------------|------------------|-----------------|-----------------------------------------------|
| HAND2         |                  | N/D             |                                               |
| HAND3         | A0A0S3QM10       | 3.11            | HC LLHPMNQHGA EDADREVL MW KFDS(p)ALAR         |
| HAND4         |                  | N/D             |                                               |
| HAND6         | C8C8S7           | 2.8             | LEPVEA EEVEEANKGE NNCLLHPVS(p)L HGIEDPEREV LR |
| HAND7         | A0A0S3QM10       | 2.79            | HC LLHPMNQHGA EDADREVL MW KFDS(p)ALAR         |
| HAND11        | A0A0S3QM10       | 2.70            | HC LLHPMNQHGA EDADREVL MW KFDS(p)ALAR         |
| HAND12        |                  | N/D             |                                               |
| HAND13        |                  | N/D             |                                               |
| HAND14        | A0A0S3QM10       | 2.42            | HC LLHPMNQHGA EDADREVL MW KFDS(p)ALAR         |
| HAND15        | J3R288           | 2.88            | KAEPGEPGE PAADGVGAVS (p) RDLEK                |
| HAND16        | C8C8S7           | 2.98            | LEPVEA EEVEEANKGE NNCLLHPVS(p)L HGIEDPEREV LR |
| HAND17        | A0A088LIZ2       | 2.72            | QAEPAREPA AVGVGAAS(p)QD LDK                   |
| HAND18        |                  | N/D             |                                               |
| HAND25        | C8C9H1           | 2.52            | MR QAEPEPAAAG VGAVS(p)RDLEK                   |
| HAND41        | E0WWI5           | 2.92            | R NEPAVEPAAV GVGAVS(p)RDLA ER                 |
| HAND44        | A0A248XAX7       | 2.23            | RE ERWHAVR                                    |
| HAND45        |                  | N/D             |                                               |

ND – not detected.
